# Supplementary material for: Characterization of Cleavage Events in the Multifunctional Cilium Adhesin Mhp684 (P146) Reveals a Mechanism by Which Mycoplasma hyopneumoniae Regulates Surface Topography
Source: PubMed Central journal article supplement — mBio. 2012 Apr 3;3(2):e00282-11. doi: 10.1128/mBio.00282-11 (PMC3322551; doi:10.1128/mbio.00282-11), 2012-04-03
Supplement: mbo002121253st1.pdf [file mbo002121253st1.pdf]

**Table S1.** Sequences of primers used in this study

| Designation     | Sequence                                      | Length (bp) | Target                                    |
|-----------------|-----------------------------------------------|-------------|-------------------------------------------|
| P146F1F         | <u>CACCGTTGCCTTTAAATCCGATGTC</u>              | 25          | F1 <sub>P146</sub> forward primer         |
| P146F1R         | <u>TCATACCTTAAAGTCGCTAAGTTG</u>               | 24          | F1 <sub>P146</sub> reverse primer         |
| P146F2F         | <u>CACCGCTCCACAGACAAGTTCTTCG</u>              | 25          | F2 <sub>P146</sub> forward primer         |
| P146F2R         | <u>TCACTCTTGTTGTTGGA</u> ACTCGGT              | 24          | F2 <sub>P146</sub> reverse primer         |
| P146F3F         | <u>CACCGCAAATTCAACTAATTCTAGT</u>              | 25          | F3 <sub>P146</sub> forward primer         |
| P146F3R         | TTACCTCGCCGCCTTAGCAG                          | 20          | F3 <sub>P146</sub> reverse primer         |
| P146Mut1F       | GTTTCAGCTTGGTCTAACTTAGAT                      | 24          | TGA mutation 1 forward primer             |
| P146Mut1R       | ATCTAAGTTAGACCAAGCTGAAAC                      | 24          | TGA mutation 1 reverse primer             |
| P146Mut2F       | TCAAGTTTCTTTGGTGATTCA                         | 21          | TGA mutation 2 forward primer             |
| P146Mut2R       | TGAATCACCAAAGAACTTGACCAAAGACTAAT              | 33          | TGA mutation 2 reverse primer             |
| P146Mut3F       | GAGGCACTTTTAGATGCTTGGGTTGGAAAACAAAATTC        | 39          | TGA mutation 3 forward primer             |
| P146Mut3R       | GAAATTTTGTTCCTCAACCAAGCATCTAAAAGTGCCTC        | 39          | TGA mutation 3 reverse primer             |
| P146Mut4F       | CAGGCTAAAAGATTAATTTTGCAAGTTGGAGTCAACTCCAAGACG | 46          | TGA mutation 4 forward primer             |
| P146Mut4R       | CGTCTTGGAGTTGACTCCAACTTGCAAATTTAATCTTTTAGCCTG | 46          | TGA mutation 4 reverse primer             |
| P146Mut5F       | GAACAAGTTAAAACAAATAATGGCC                     | 25          | TGA mutation 5 forward primer             |
| P146Mut5R       | GGCCATTATTTGTTTTAACTTGTTCCTTCACTTTGTTTTAGATA  | 46          | TGA mutation 5 reverse primer             |
| P146Mut5F (J)   | GATCAAGTTAAAACAACAAATAATG                     | 25          | TGA mutation 5 for. primer (J)            |
| P146Mut5R (J)   | CATTATTTGTTGTTTTAACTTGATCCCATTCTTTTGTTTTAGATA | 46          | TGA mutation 5 rev. primer (J)            |
| P146F3R (J)     | TTACTTCGCCGCTTTAGCAG                          | 20          | F3 <sub>P146</sub> reverse primer (J)     |
| P146F3R (ΔK)    | TTACGCCGCTTTAGCAGCAGCTGCTGCAGGAGCACTAGAA      | 40          | F3 <sub>P146</sub> reverse primer (ΔK)    |
| P146F3R (232ΔR) | TTACGCCGCCTTAGCAGCAGCAGCTGCTGCCGGAGCACTA      | 40          | F3 <sub>P146</sub> reverse primer (232ΔR) |

Additional sequence CACC (underlined) added to facilitate directional cloning into pET100/GW/D-TOPO vector. Additional sequence TCA (underlined) added to signal end of translation. Unique primers required to create strain J and 232 versions of F3<sub>P146</sub> are labelled in brackets.
